# Supplementary material for: SIP1 is a downstream effector of GADD45G in senescence induction and growth inhibition of liver tumor cells
Source: PubMed Central journal article supplement (PMC4741791; doi:10.18632/oncotarget.5602), 2015-09-10
Supplement: oncotarget-06-33636-s001.pdf [file oncotarget-06-33636-s001.pdf]

# SIP1 is a downstream effector of GADD45G in senescence induction and growth inhibition of liver tumor cells

## Supplementary Material

**Table 1. Clinicopathological Variables and GADD45G and SIP1 expression in HCC**

| Patients characteristics                    | Average ( $\pm$ SD) | Case, n | GADD45G expression |               |                | SIP1 expression |               |                |
|---------------------------------------------|---------------------|---------|--------------------|---------------|----------------|-----------------|---------------|----------------|
|                                             |                     |         | positive(4-12)     | negative(0-3) | <i>P</i> value | positive(4-12)  | negative(0-3) | <i>P</i> value |
| <b>Sex</b>                                  |                     |         |                    |               |                |                 |               |                |
| Female                                      |                     | 11      | 4                  | 7             |                | 5               | 6             |                |
| Male                                        |                     | 29      | 9                  | 20            | 0.748          | 14              | 15            | 0.873          |
| <b>Age (yr)</b>                             |                     |         |                    |               |                |                 |               |                |
| < 50                                        | 43.4 $\pm$ 5.3      | 24      | 8                  | 16            |                | 13              | 11            |                |
| $\geq$ 50                                   | 58.6 $\pm$ 7.0      | 16      | 5                  | 11            | 0.890          | 6               | 10            | 0.301          |
| <b>Histological grade (Differentiation)</b> |                     |         |                    |               |                |                 |               |                |
| Well                                        |                     | 3       | 1                  | 2             |                | 3               | 0             |                |
| Moderate                                    |                     | 30      | 11                 | 19            |                | 17              | 13            |                |
| Poor                                        |                     | 7       | 1                  | 6             | 0.522          | 3               | 4             | 0.242          |
| Total                                       |                     | 40      |                    |               |                |                 |               |                |

*P* value was studied by chi-square test.
